# Supplementary material for: Loneliness and social networks of older adults in rural communities: a narrative synthesis systematic review
Source: Front Public Health. 2023 May 15;11:1113864. doi: 10.3389/fpubh.2023.1113864 (PMC10225733; doi:10.3389/fpubh.2023.1113864)
Supplement: Supplementary file 1 [file Table_1.XLSX]

## Sheet: Sheet1
Appendix B - Data extraxtion, findings and quality assessment
Study Reference	Aim	Method	Sample ( Setting, Technique, size)	Analysis Technique	Findings ( Reported outcomes on H&WB of older people)	Quality assessment
Franke, T., Sims-Gould, J., Lusina-Furst, S., & McKay, H. (2022). “I Didn’t Think I Needed It. But I Find I Look Forward to It Very Much”: Social Connectedness and Physical Health through the Eyes of Older Adults. Activities, Adaptation & Aging, 46(1), 9-30.	To contribute to the formative evaluation by providing information that will shed light on the perceptions of older adults living in a rural context and what they believe “it means to be active.”	Qualitative	Canada. 13, 2 men and 11 women participants from Active Aging program which supports community-driven health promotion to increase physical activity and social connectedness of older adults. Examples of physical and social activities offered include walking groups, Garden Club activities, swim programs, Tai Chi, peer support, bee garden, meals, carpet bowling, language education, tea socials, out…	Thematic	Social connectedness established by participating in activities that not only provided social contact but also to talk and share thoughts, help them feel cared for, and supported, and created a sense of belonging. Being physically and socially active helps in staying mentally well. All of these factors worked together to sustain motivation and participation in activities. Participation in social …	Very good
Latham-Green et al. (2021). Examining the role of driven-game shooting as a psycho-social resource for older adults in rural areas: a mixed-methods study. Ageing & Society, 1-27.	To explore if regular involvement in a rural, country sport, frequently practised by older individuals, builds social capital and friendships, reduces loneliness, and positively impacts individuals’ health and wellbeing.	Mixed method	UK. During the August 2018 to February 2019 shoot season, consisting of seven field visits to shoots in rural settings across England to gain observational case study data, and identify 45 participants for interviews.	Grounded theory-based Constant Comparative Method and Independent sample t-tests were undertaken in order to explore the experimental and comparison datasets.	Driven-game shooting participation creates social impact via social capital creation and identity reinforcement. Statistically significant, positive impact on mental health and wellbeing is also noted.	Good
Tomaz, S. A., Coffee, P., Ryde, G. C., Swales, B., Neely, K. C., Connelly, J., ... & Whittaker, A. C. (2021). Loneliness, wellbeing, and social activity in scottish older adults resulting from social distancing during the COVID-19 pandemic. International journal of environmental research and public health, 18(9), 4517.	Examined the impact of social distancing during the COVID-19 pandemic on loneliness, wellbeing, and social activity, including social support, in Scottish older adults.	Mixed method	UK. Convenient and snowball. Participants were recruited across Scotland via social media (Twitter, Facebook), emails to colleagues at other Scottish Universities, partner organisations and contacts including care homes, churches, sports clubs, charities for older adults, third sector and intermediary organisations for individuals with learning disabilities and carers, national dementia organisat…	Thematic analysis using inductive and deductive appraoches and a bivariate Clayton copula model with Gamma margins described by generalised additive models was employed to explore the association of loneliness (UCLA) and wellbeing (EQ5D-3L) with the explanatory variables jointly.	Social distancing regulations resulted in reduced social contact and suport and more loneliness. Coping strategies included increasing online social contact with existing social networks and reconnecting with previous networks, increasing contact with neighbours and people in the community.	Very good
de Koning, J., Richards, S. H., Wood, G. E., & Stathi, A. (2021). Profiles of loneliness and social isolation in physically active and inactive older adults in rural England. International journal of environmental research and public health, 18(8), 3971.	To explore the socioecological context in which both physically active and inactive older adults experience loneliness and/or social isolation in a UK rural setting.	Mixed method	UK. Twenty-four older adults (Mean Age = 73 (5.8 SD); 12 women) were interviewed. Semi structured interviews and accelerometer-measured moderate-to-vigorous physical activity (MVPA).	Themetic	Identified 07 profiles of physical activity, social isolation and loneliness. The high-MVPA group had established PA habits, reported several sources of social contact and evaluated their physical environment as activity friendly. The low MVPA group had diverse experiences of past engagement in social activities. They reported a range of sources of social contact but did not perceive the physical…	Good
Liu, Y., Huang, L., Liu, Q., Qian, G. Z., Zou, H., & Zhang, S. (2021). Moderating effect of psychological resilience on the perceived social support and loneliness in the left-behind elderly in rural areas. Frontiers of Nursing, 8(4), 357-363.	To investigate the loneliness and psychological resilience with the perceived social support of the left-behind elderly in rural areas and explore the moderating effect of psychological resilience on the understanding of social support and loneliness of the left-behind elderly in rural areas.	Quantitative Descriptive	China. 272 left-behind elderly people in 6 rural villages in the Sichuan Province were investigated by using the General Situation Questionnaire, Perceived Social Support Scale (PSSS), Connor-Davidson Resilience Scale (CD-RISC), and the University of California at Los Angeles Loneliness Scale (UCLA) with a stratified random cluster sampling method.	Spearman correlation to analyze the correlation between perceived social support, psychological resilience, and loneliness of left-behind elderly. Structural equation models (SEMs) to examine the moderating effect of psychological resilience on perceived social support and loneliness.	The loneliness score of the left-behind elderly in rural areas was 52.54 ± 7.25, the psychological resilience score was 78 (68.87), and the perceived social support score was 57 (51.62). The perceived social support and psychological resilience were negatively correlated with loneliness, while the perceived social support was positively correlated with psychological resilience. Psychological resi…	Good
Sánchez-Moreno, E., Gallardo-Peralta, L. P., & Leyton, C. (2021). The Social Gradient in Mental Health and Well-Being for Indigenous Older Adults Living in Rural Areas: A Cross-Sectional Comparison With Rural Non-indigenous Population in Chile. Journal of Aging and Health, 33(5-6), 287-299.	To compare differences in depression, loneliness and personal well-being in a sample made up of indigenous (Aymara and Mapuche) and non-indigenous older people resident in original rural territories.	Quantitative Descriptive	Chile. Convenient sampling. 800 older adults living in a rural context in Chile, of whom 201 were Aymara, 368 Mapuche and 231 nonindigenous.	Ordinary least squares regression.	Older Aymara and Mapuche people obtained lower scores for the loneliness variable than non-indigenous people. Regarding social participation, only participation in neighbourhood and religious groups showed a negative association with loneliness.	Very good
Li, S., Dai, Y., Zhou, Y., Zhang, J., & Zhou, C. (2021). Efficacy of group reminiscence therapy based on Chinese traditional festival activities (CTFA-GRT) on loneliness and perceived stress of rural older adults living alone in China: a randomized controlled trial. Aging & Mental Health, 1-8.	To explore the efficacy of group reminiscence therapy based on Chinese traditional festival activities (CTFA-GRT) to mediate the loneliness and perceived stress of older adults living alone in rural China.	Quantitative randomized controlled trial	China. 64 participants. Convenient sampling from two townships.	A repeated- measures analysis of variance model to compare each outcome measure of the two groups.	The CTFA-GRT yielded a benefit for the perceived stress and loneliness of rural older adults living alone in the intervention group. Combined with a simple effects test, the PSS and UCLA-LS of those in the intervention groups significantly decreased at eight months after the baseline (F PSS = 23.540, F UCLA-LS = 40.159; all P < 0.01). In addition, the sustainable effect of this program lasted thr…	Very good
Çam, C., Atay, E., Aygar, H., Öcal, E. E., Önsüz, M. F., Işıklı, B., & Metintaş, S. (2021). Elderly people's quality of life in rural areas of Turkey and its relationship with loneliness and sociodemographic characteristics. Psychogeriatrics, 21(5), 795-804.	To examine the relationships between loneliness, quality of life and the factors that may be related to the quality of life in individuals ≥65 years old living in rural areas of Turkey.	Quantitative Descriptive	Turkey. 427 elderly participants.	Multiple linear regression to determine the variables that affected QOL..	Loneliness level had the strongest negative impact on the four WHOQOL OLD subdomains and total WHOQOL OLD score. It was the most important predictor for autonomy, past present future activities, social participation, death-and-dying, and intimacy subdomains and for the total QOL.	Good
Li, H., & Wang, C. (2021). The Relationships among Structural Social Support, Functional Social Support, and Loneliness in Older Adults: Analysis of Regional Differences based on a Multigroup Structural Equation Model. Frontiers in psychology, 12.	Investigated the relationship between structural social support and loneliness and explored whether functional social support had an intermediate role therein.	Quantitative Descriptive	China. 1,325 older adults identified via convenient sampling. Rural area (N = 602; 45.4%) .	A multigroup structural equation model to compare mediation models among older adults living in cities, towns, and rural areas.	Older rural adults had higher structural social support and experienced less loneliness, while older adults’ functional social support showed no difference among the three regions. Regional differences analysis model indicated that functional social support served as a full mediator in the relationship between structural social support and loneliness in urban older adults, and a partial mediator …	Good
Boyd, M., Calvert, C., Tatton, A., Wu, Z., Bloomfield, K., Broad, J. B., ... & Connolly, M. J. (2021). Lonely in a crowd: loneliness in New Zealand retirement village residents. International Psychogeriatrics, 33(5), 481-493.	To describe the prevalence of loneliness and associated factors in a New Zealand Retirement Village (RV) population.	Resident survey	Residents living in 33 RVs (n = 578). Randomly sampled cohort (n = 217) and volunteer sample (n = 361).	Independently associated factors for loneliness were determined through multiple logistic regression with odds ratios (ORs).	Factors independently associated with interRAI loneliness included being widowed (adjusted OR 8.27; 95% confidence interval [CI] 4.15 16.48), being divorced/ separated/never married (OR 4.76; 95% CI 2.15–10.54), poor/fair quality of life (OR 3.37; 95% CI 1.43–7.94), moving to an Retirement Village (RV) to gain more social connections (OR 1.55; 95% CI 0.99–2.43).
Kim, J. E., Lee, Y. L., Chung, M. A., Yoon, H. J., Shin, D. E., Choi, J. H., ... & Nam, E. W. (2021). Effects of social prescribing pilot project for the elderly in rural area of South Korea during COVID‐19 pandemic. Health Science Reports, 4(3), e320.	To examine the effects of a pilot social prescribing project for elderly people in rural area of South Korea during the COVID-19 pandemic.	Quantitative non-randomized	South Korea. The program participants were 16 adults aged 65 or older, recommended by the Administrative and Welfare Office in a rural area in Gangwon Province. They consented to participate in the study's interventions over 10 weeks. Of the 16 participants, 10 attended all 10 program sessions, and these participants were selected as the study subjects.	Wilcoxon signed-rank test for impact and outcome evaluations of the social prescribing programs.	loneliness reduced significantly, while the social participation attitude score increased. Although the average score of self-efficacy increased, it was not statistically significant. Self-esteem increased significantly. Depression reduced considerably.	Good
Garabrant, A. A., & Liu, C. J. (2021). Loneliness and activity engagement among rural homebound older adults with and without self-reported depression. The American Journal of Occupational Therapy, 75(5).	To describe the degree of depression, loneliness, and activity engagement among rural homebound older adults and determine differences in loneliness and activity engagement between those with and those without self-reported depression.	Quantitative Descriptive	USA. Two rural counties in south central Indiana. Homebound adults ages 60 yr and older who received nutritional or companionship services from a local Area Agency on Aging.	Used x2 tests to analyze categorical data and Mann–Whitney U tests to analyze ordinal data.	78 relevant responses. Participants in general reported moderate loneliness and low to moderate engagement in meaningful activities. Those with self-reported depression had significantly higher loneliness and lower activity engagement, particularly in self-care, leisure, and socializing activities.	Good
Bunt, S., Steverink, N., Douma, L., van der Schans, C., Hobbelen, H., & Meijering, L. (2021). Experiences of social frailty among rural community-dwelling and assisted-living older adults: a qualitative study. Ageing & Society, 1-21.	To obtain a more in-depth understanding of the concept of social frailty and to explore whether there are differences in the social frailty experiences between community-dwelling and assisted-living older adults.	Qualitative	Nethelands. Used 38 interviews that were collected from the participants living in villages who were involved in the primary study. Participant recruitment, e.g. via personal visits, advertisements or snowballing. Of our 38 participants, 26 were community-dwelling older adults and 12 were residing in an assisted-living environment.	Thematic. A secondary analysis of an existing qualitative dataset. Hybrid deductive/inductive.	Community-dwelling participants reported loneliness, assisted-living participants felt loss of mobility and participation in (social) activities. Observed a hierarchy in the relative importance for fulfilling the need for affection. The social resource that was most important for participants was family (spouses, (grand)children, siblings). other social resources include friends, neighbours, and …	Very good
Nazari, M., Jokar, F., Fararooei, M., & Kaveh, M. H. (2021). The Effectiveness of Social Participation Educational Program on the Feeling of Loneliness of Elderly People in Rural Areas of Baiza City (South of Fars Province). Journal of Health Sciences & Surveillance System, 9(3), 155-161.	To determine the impact of the educational program of social participation on the feeling of loneliness.	Cross-sectional analytic study	Iran. Convenience sampling. 239 elderly people aged ≥60 years living in rural regions of Baiza, Sheraz, Iran.	Analytic statistical tests Chi Square, T-paired, and T-independent and ANCOVA were used.	After one month of educational intervention program, the mean score of social participation increased in the intervention group from 6.17±3.86 to 17.98±3.84 after the intervention. remarkable improvement in loneliness feeling scores of the mentioned group form 62.24±.7.53 to 28.86±6.88 after the intervention (P<0.001). Control group experienced no significant changes in the two mentioned variable…	Very good
Liu, Y., Qu, Z., Meng, Z., & Wang, S. (2020). Relationship between loneliness and quality of life in elderly empty nesters from the Wolong Panda Nature Reserve in Sichuan province, China, from the perspective of Rural Population and Social Sustainability. Physica A: Statistical Mechanics and Its Applications, 551, 124154.	To examine the extent that social support slows the impact of loneliness on the quality of life (QOL) of elderly empty nesters in Wolong Panda Nature Reserve, China.	Quantitative Descriptive	China. 675 participant from the Wolong Panda Nature Reserve in Wenchuan County, Sichuan province. Participants were recruited from all six villages in Wolong Panda Nature Reserve: Gengda, Zhuanjinglou, Xingfu, Zumushan, Longtan, and Wolongguan. The inclusion criteria were (1) local resident; (2) aged 60 years or more; (3) did not live with children; and (4) had no diagnosed mental disorder.	Descriptive statistics, and a one-way ANOVA, correlation analysis and multiple regression analysis.	Loneliness has a negative impact on QOL. Social support may alleviate the negative effect of loneliness on QOL in elderly empty nesters. a strong correlation was observed among loneliness, the SSRS, and QOL. The correlation analysis indicated that QOL was associated with the three SSRS aspects (SS, r = 0.53; OS, r = 0.35; SA, r = 0.18) The analysis proved that loneliness had a negative effect on …	Very good
Wang, X., Liu, M., Li, Y., Guo, C., & Yeh, C. H. (2020). Community canteen services for the rural elderly: determining impacts on general mental health, nutritional status, satisfaction with life, and social capital. BMC public health, 20(1), 1-9.	To investigate the impact of canteen services on older adults’ general mental health, nutritional status, satisfaction with life, and social capital in rural areas.	Cross-sectional analytic study	China. Participants were 284 senior older adults (aged 75~98), including 140 residing in villages with canteen services (Canteen Group [CG]) and 144 residing in villages without canteen services (Non Canteen Group [NCG]). We also divided the CG into two subgroups according to the funding sources (one receiving government support only, the other receiving government support plus enterprise donatio…	Descriptive statistics were presented as the mean and SD for continuous variables, and the number (percentage) for categorical variables. Means for age, satisfaction with life, nutritional assessment, social capital, general health, satisfaction with the meals, and self-evaluation of meal nutrition were compared between the CG and NCG using independent t-tests.	The overall mental health, satisfaction with life, and social capital of the Canteen Group were better than the NCG (P < 0.05).	Good
Jiang, D., Hou, Y., Hao, J., Zhou, J., Jiang, J., & Wang, Q. (2020). Association between personal social capital and loneliness among widowed older people. International journal of environmental research and public health, 17(16), 5799.	To explore the association between the personal social capital and loneliness among the widowed older adults in China.	Cross-sectional analytic study	China. Data from 981 widowed older adults from rural areas were extracted from China’s Health-Related Quality of Life Survey for Older Adults 2018.	Multiple linear regression models were established to examine the relationship between social capital and loneliness.	The BOC and BRC of rural widowed older people were significantly lower. loneliness of rural participants was significantly associated with both BOC (B = 0.141, p = 0.001) and BRC (B = 􀀀0.116, p = 0.003).	Good
Willard, S., van Rossum, E., Spreeuwenberg, M., & de Witte, L. (2020). Perceived impact of an online community care platform for Dutch older adults on local participation, informal caregiving, and feelings of connectedness: Pretest-posttest observational study. Journal of Medical Internet Research, 22(12), e20304.	To investigate the self-reported use, expectations, and perceived impact of a Dutch online community care platform called Grubbenvorst-Online among Dutch older adults. Questions studied were : (1) What is the self-reported use of Grubbenvorst-Online among older adults? (2) What are their expectations and perceived impact of Grubbenvorst-Online regarding local participation, their social network, …	Cross-sectional analytic study	Netherlands. 47 ‘internet skilled’ participants were recruited via a web-based message on the Grubbenvorst Online platform and data were collected via postal questionnaires among older users at the start of the study and 4 months later.	Data regarding the expectations and the perceived impact of Grubbenvorst-Online were compared and tested.	Internet important for maintaining social contacts. Use of the online community care platform decreased during the 4-month follow-up period. The perceived impact of Grubbenvorst-Online was significantly lower than that expected regarding information provision (P=.003), seeking help from fellow villagers (P<.001), giving help to fellow villagers (P<.001), and consulting care or welfare services (P…	Poor
Conkova, N., Vullnetari, J., King, R., & Fokkema, T. (2019). “Left like stones in the middle of the road”: Narratives of aging alone and coping strategies in rural Albania and Bulgaria. The Journals of Gerontology: Series B, 74(8), 1492-1500.	To explore and compare older adults’ lived experiences and coping strategies in two post-communist countries—Albania and Bulgaria	Qualitative	Albania and Bulgaria. 28 in-depth interviews with older residents and participant observation in selected rural areas of the two countries.	Textual segments were categorized with deductive (theory-driven), inductive (data-driven), and in vivo (using participants’ own words) codes to prepare the analysis.	Social isolation is expressed as a lack of close family ties, mainly due to outmigration of children and grandchildren, and detachment from society .Coping mechanism include practical and emotional support from non kin ties, especially neighbours. Remittances from childeren help to meet material needs. Identifed emotion focused coping strategies: perceptions of decreased needs, lowered expectatio…	Very good
Shergold, I. (2019). Taking part in activities, an exploration of the role of discretionary travel in older people's wellbeing. Journal of Transport & Health, 12, 195-205.	To address how does the level of out-of-home mobility afforded to a person relate to their ability to be involved in activities (solitary, informal and formal)? and Is there evidence of a link between these activities (and specifically informal activity), and subjective wellbeing for the participants in this study?	Quantitative Descriptive	UK. (N = 920)	Descriptive analysis of the data, a series of binary logistic regression models facilitate exploration of relationships between mobility and activity, and then activity and wellbeing.	Those with car access are up to three times more likely to participate in formal activity (OR 3.228; CI 1.656, 6.293). There are higher levels of informal activity for those without car access (65% of this group engage in activity with friends’ weekly compared to only 51% of those with car access). Lack of weekly activity with friends and family slightly increases the probability of loneliness (O…	Very good
Roos, V., Keating, N., & Kahl, C. (2019). Loneliness of older black South African women subjected to forcible relocation. Global Health Action, 12(1), 1672329.	To understand loneliness of a group of older women who have been rendered vulnerable by longstanding exclusion from community, services, and material resources.	Qualitative	South Africa. Approximate purposive. 16 Setswana-speaking women in Ikageng, a rural township in North West Province of South Africa (age 61–73),	Textual data were analyzed using thematic analysis, visual data analysis of elements and symbolic representations of loneliness.	Loneliness is very unpleasant experience of not being able to interact with other people in general, or more specifically because of the loss of particular people (including spouses, parents and children) and isolation provoked by the impact of relational interactions and group dynamics. Loneliness was mitigated by socializing and gathering for traditional activities, performing spiritual rituals…	Good
De Koning, J., Richards, S., & Stathi, A. (2019). Loneliness, social isolation, and objectively measured physical activity in rural-living older adults. Journal of aging and physical activity, 28(3), 467-477.	To examine whether objectively measured physical activity and specific activites are associated with lonelienss and social isolation.	Quantitative Descriptive	UK. 112 older adults, both male and female from villages in Wiltshire completed questionnaire, 7-day accelerometry and activity diary.	Regression analysis to test association between objectively measured light PA, moderate to vigorous PA and total PA; loneliness; and social isolation from family, neighbours or friends, and to explore these association using specific activities.	Daily mean light, modertae to vigorous, and total PA was not associated with loneliness or social isolation. Volunteerings, accompanying others and sports/exercise were associated with lower social isolation from neighbour, family and friends respectively. There were no association between loneliness, social isolation and objectively measured PA.	Good
Ashida, S., Sewell, D. K., Schafer, E. J., Schroer, A., & Friberg, J. (2019). Social network members who engage in activities with older adults: Do they bring more social benefits than other members?. Ageing & Society, 39(5), 1050-1069.	To Investigate the extent to which two specific types of interactions, co-engagement in social activity and meal sharing, occur within older adults’ social networks; and how these interactions relate to the three key functions of social networks (i.e. social support, companionship, social influence) that have implications on health.	Quantitative Descriptive	USA. Adults aged 60 years or older living in a rural Midwestern city in the United States of America (USA) participated in a one-time interview that lasted 45-60 minutes. Initial respondents (index respondents) were recruited in collaboration with local organisations serving older adults (e.g. ageing service providers, non-profit organisations, churches, housing authority, retiree associations).	Linear regression	Relationships involving co-engagement were more likely to convey social support (i.e. emotional, instrumental, informational), companionship and social influence (encouragement for healthy behaviours) than relationships that do not involve co-engagement. Having more network members who provide companionship was associated with higher sense of environmental mastery, positive relations with others …	Good
Herbert, A. (2018). How ageing and quality of life is influenced by social relationships: an exploration of rural midlife women in Ireland. Sociální studia/Social Studies, 15(1), 45-64.	To examine and contribute to the existing body of knowledge on gendered rural ageing by exploring, from a life course perspective, the pivotal role of social relationships in shaping the quality of life for rural women at mid‑life and beyond.	Qualitative	Ireland. Qualitative interviews with 25 women in rural Ireland aged 45–65 years, 6 women are over 60.	Grounded theory analysis	Identified factors for social exclusion and coping. Some volunteering to keep busy, not want to retire to seriously reduce sense of well‑being. A strong social and working relationship with husband, a strong life purpose, and above all a passion for their shared religious interests would cushion her against deficits in health and income in older age. Showed high intersections between social relat…	Good
Feng, Z., Phillips, D. R., & Jones, K. (2018). A geographical multivariable multilevel analysis of social exclusion among older people in China: Evidence from the China Longitudinal Aging Social Survey ageing study. The Geographical Journal, 184(4), 413-428.	To simultaneously estimate four dimensions of social exclusion among older people.	Quantitative Descriptive	China. N:7518, 35.6% rural sample.	multivariate multilevel models	Older groups amongst the over 60s were more likely to feel excluded (coefficient = −0.007), with other strong effects being for rural residents. Older people who were male, rural residents, economically active, and those who own property were significantly less likely to be excluded from financial products than females.	Good
Bantry‐White, E., O'Sullivan, S., Kenny, L., & O'Connell, C. (2018). The symbolic representation of community in social isolation and loneliness among older people: Insights for intervention from a rural Irish case study. Health & social care in the community, 26(4), e552-e559.	To examine how representations of rural community in Ireland influenced the focus, relationships and activities within a befriending intervention designed to tackle social isolation and loneliness.	Qualitative	Ireland. Purposively selected participants (8 befriended, 11 befrienders and 3 community workers) from one befriending programme in rural Ireland.	Interpretive analytical framework	Old photographs and poetry from the local area created a sense of common ground within the relationship. Geographical spaces such as shops, churches, community halls held meanings of communal gatherings and togetherness. Rural isolation was compounded by the perceived loss of neighbours, eroding a sense of community and personal security. Changing demographics, deficiencies in public transport an…	Very good
Evans, N., Allotey, P., Imelda, J. D., Reidpath, D. D., & Pool, R. (2018). Social support and care arrangements of older people living alone in rural Malaysia. Ageing & Society, 38(10), 2061-2081.	To explore the social support and care arrangements of older people living alone in rural Malaysia.	Qualitative.	Malaysia. Purposive. Malay (N = 20) and Chinese (N = 20)	Themetic	For Malays, most support came from nearby adult children and relatives, whereas Chinese participants, who less frequently had adult children living locally, emphasised support from friends and neighbours. Emigrant adult children’s assistance was mostly informational and financial, instrumental assistance was either substituted for money, or provided solely during periods of ill-health. Physical d…	Very good
Boulos, C., Salameh, P., & Barberger‐Gateau, P. (2017). Social isolation and risk for malnutrition among older people. Geriatrics & gerontology international, 17(2), 286-294.	To evaluate the association between three components of social isolation: social network, feeling of loneliness, commensality, and nutritional status.	Quantitative Descriptive	Lebanon. 1200 randomly selected.	Bivariate analyses. Binary logistic regression analysis to see association.	Both social isolation and loneliness were independently associated with a higher risk of malnutrition (OR 1.58, P = 0.011; OR 1.15, P 0.020, respectively). However, no association was found between the frequency of sharing meals and the risk of malnutrition, showing that social isolation and subjective loneliness are two independent risk factors for malnutrition among older people.	Very good
Berg, T., Winterton, R., Petersen, M., & Warburton, J. (2017). ‘Although we're isolated, we're not really isolated’: The value of information and communication technology for older people in rural Australia. Australasian Journal on Ageing, 36(4), 313-317.	To examine the specific contribution made by information and communication technology (ICT) to facilitate wellness among older people .	Qualitative	Australia. Purposively selected 60 participants.	A preliminary followed by a higher order inductive analysis.	Information and communication technology use was discussed in terms of individual enrichment, and in terms of enabling connections between the individual and their social networks, community and wider service environments.	Very good
Wang, G., Hu, M., Xiao, S. Y., & Zhou, L. (2017). Loneliness and depression among rural empty-nest elderly adults in Liuyang, China: a cross-sectional study. BMJ open, 7(10), e016091.	To compare loneliness, depressive symptoms and major depressive episodes between empty-nest and not-empty-nest older adults in rural areas of Liuyang city, Hunan, China.	Quantitative Descriptive	China. Multi-stage random cluster. 814.	Multiple linear regression and path analysis	Spouses and adult children are important sources of social support for the rural elderly. Physical disease may cause loneliness by limiting the ability of the rural elderly to participate in social activities.	Very good
MacLeod, A., Skinner, M. W., Wilkinson, F., & Reid, H. (2016). Connecting socially isolated older rural adults with older volunteers through expressive arts. Canadian Journal on Aging/La Revue Canadienne du Vieillissement, 35(1), 14-27.	To examine an innovative program from rural Ontario, Canada, designed to address social isolation among older people.	Qualitative	Canada. Sixteen volunteers and participants were recruited by the program leader (Wilkinson) in 2009 largely through word of mouth, and through letters of information provided to health and social service providers and volunteer organizations such as the local Arts Council, as well as through the local media and an open information meeting. The program involved eight older female volunteers (aged…	Thematic and narrative-based analysis which was a collaborative, reflective process. Analysed the experiences and perceptions of the program leader, older participants, and older volunteers via their artistic creations, weekly logs, evaluations, and field notes.	A successful intervention that positively influenced the well-being of older adult participants especially regarding relationships, personal development, and creating meaning and extending the intervention’s impact beyond the program’s duration. Artmaking was a medium to address social isolation within the participant’s home. The social component and engagement between the artistic creator and an…	Very good
Cheng, P., Jin, Y., Sun, H., Tang, Z., Zhang, C., Chen, Y., ... & Huang, F. (2015). Disparities in prevalence and risk indicators of loneliness between rural empty nest and non‐empty nest older adults in C hizhou, C hina. Geriatrics & Gerontology International, 15(3), 356-364.	To determine the disparities in prevalence and risk factors of loneliness between rural empty nest and non-empty nest older adults in Chizhou, China.	Quantitative Descriptive	China. 730. Multistage-stratified random cluster sampling	Multi-linear regression analysis	level of loneliness significantly differ between empty nest older adults and non-empty nest older adults (41.52 ± 6.98 vs 39.46 ± 7.38). Empty nesters had significantly higher Geriatric Depression scale (GDS) scores; by contrast, they received lower objective, subjective and family support. Family support, objective support and social interaction were associated significantly with loneliness, whi…	Very good
Pearce, R., & Lillyman, S. (2015). Reducing social isolation in a rural community through participation in creative arts projects. Nursing older people, 27(10).	To report the initial findings from the evaluation of four creative arts projects for reducing social isolation among elderly in rural areas.	Cross-sectional analytic study	UK.52 participants taking part in four projects.	Descrptive statistics. Thematic for qualitative.	Increased levels of self-worth and self-esteem among participants. Older people involved agreed that they had made new friends while having the opportunity to try out a new activity.	very poor
Buys, L., Burton, L., Cuthill, M., Hogan, A., Wilson, B., & Baker, D. (2015). Establishing and maintaining social connectivity: An understanding of the lived experiences of older adults residing in regional and rural communities. Australian Journal of Rural Health, 23(5), 291-294.	To better understand how to plan for an ageing demographic that resides in ever-changing community typologies.	Qualitative	Australia. 22 (12 from rural) people aged over 65 years living in regional and rural Australia. Here findings related to rural participants are presented only.	Themetic	Formal and informal social contact, through family, friends and social groups, was found to be important to the everyday lives of the participants. depth in connectivity emerged in the context of relationships with family, friends or neighbours that participants could rely on in an emergency. Neighbours were particularly reliable. Both breadth and depth of connectivity can result from engagement …	Very good
Lewis, J. (2014). The role of the social engagement in the definition of successful ageing among Alaska native elders in Bristol Bay, Alaska. Psychology and Developing Societies, 26(2), 263-290.	Explores the role of social engagement (family and community support) in Alaska Native (AN) Elders’ definitions of successful ageing, why social engagement is important to the health and wellbeing of AN Elders.	Qualitative	USA. Each tribal council nominated AN Elders, ranging in age from 61 to 93 years old, resulting in a purposive sample of 25.	Content analysis was used to find recurring themes and infer meaning from the data and understand the ageing process in rural Alaska.	The Elders discussed the importance of family and community as a source of support and part of their culture & identity. Family support provided them with meaningful roles in their family, which contributed to their well-being, optimism and generative behaviours. Community support involved Elders’ inclusion in community events and activities and feeling they were supported and meaningfully engage…	Good
Wan Mohd Azam, W. M. Y., Din, N. C., Ahmad, M., Ghazali, S. E., Ibrahim, N., Said, Z., ... & Maniam, T. (2013). Loneliness and depression among the elderly in an agricultural settlement: Mediating effects of social support. Asia‐Pacific Psychiatry, 5, 134-139.	To describe the role of social support in the association between loneliness and depression.	Quantitative Descriptive	Malaysia. Non- purposive. 161 community-based elderly in agricultural settlement of a rural area in Sungai Tengi.	Subjects were investigated with De Jong Gierveld Loneliness Scale, Geriatric Depression Scale and Medical Outcome Survey Social Support Survey. Data were analyzed using Pearson correlation, linear and hierarchical regression.	social support partially mediated the relationship between loneliness and depression.	Good
Fukunaga, R., Abe, Y., Nakagawa, Y., Koyama, A., Fujise, N., & Ikeda, M. (2012). Living alone is associated with depression among the elderly in a rural community in Japan. Psychogeriatrics, 12(3), 179-185.	To investigate factors associated with depression in a sample of elderly Japanese individuals in a rural community and to examine differences among factors associated with individuals living alone or living with others.	Quantitative Descriptive	Japan. population-based sample. 1552 participants.	Multiple regression analysis	Received 964 valid responses. Depressed subjects comprised 20.5% of the sample. Living alone was significantly related to depression. In individuals living alone, depression was associated with loss of appetite, suicidal ideation, financial strain, and worries in life. Multiple linear regression analyses revealed that the influence of living alone was negated by having a good social support syste…	Good
Theeke, L. A., Goins, R. T., Moore, J., & Campbell, H. (2012). Loneliness, depression, social support, and quality of life in older chronically ill Appalachians. The Journal of psychology, 146(1-2), 155-171.	To describe loneliness and to examine the relationships between loneliness, depression, social support, and QOL in chronically ill, older Appalachians.	Quantitative Descriptive	USA. convenience sample of 60 older.	ANOVA. T-test	Loneliness was prevalent with UCLA loneliness scores indicating moderate to high loneliness, ranging from 39 to 62 (possible scores were 20−80). Higher loneliness scores correlated with depression, lower Qol, and lower social support, particularly lower emotional support.	Good
Dwyer, P., & Hardill, I. (2011). Promoting social inclusion? The impact of village services on the lives of older people living in rural England. Ageing & Society, 31(2), 243-264.	To explore the impact of ‘village services ’ on the lives of people aged 70 or more years living in rural England.	Qualitative	UK. 44 older rural residents and users of one of the six village services (32 women and 12 men).	Grid analysis, cross-sectional thematic code and retrieval methods, and in situ non-cross-sectional analysis.	Overcoming isolation: the social impacts of village services: The services provided opportunities for social interaction and companionship. A visit from a warden or volunteer befriender, or the chance to regularly attend a lunch club, provided a focal point, something to look forward to, and something to be actively enjoyed. The services play an important role in sustaining older rural residents …	Very good
Wang, G., Zhang, X., Wang, K., Li, Y., Shen, Q., Ge, X., & Hang, W. (2011). Loneliness among the rural older people in Anhui, China: prevalence and associated factors. International journal of geriatric psychiatry, 26(11), 1162-1168.	To clarify the prevalence of loneliness and evaluate the impact of social support, family function and socio-demographic factors on loneliness and their correlation among the rural older people in Anhui, China.	Quantitative Descriptive	China.5652. Multistage Stratified Cluster	Multiple linear regressions with stepwise analysis	78.1% of the older people had moderate to severe levels of loneliness. There was a great difference between loneliness level and subjects’ age, marital status and income, family size and education level. Social support and family function were negatively associated with loneliness. Multiple regressions indicated that more social support and better family function offered protection against loneli…	very good
Heenan, D. (2011). How local interventions can build capacity to address social isolation in dispersed rural communities: A case study from Northern Ireland. Ageing International, 36(4), 475-491.	To identify the issues pertinent to these dispersed communities and reviews a locally based active ageing group, which aims to build capacity and encourage community cohesion.	Qualitative	UK. 35	Themetic	The overwhelming majority of those interviewed described their social lives and networks as limited. For many, social interaction was focused around interaction with family members who were relied upon to provide access to socialising opportunities. Whilst there was support for increasing community-based activities this desire was tempered by the need for these to be embedded in the rural way of …	Very good
Wu, Z. Q., Sun, L., Sun, Y. H., Zhang, X. J., Tao, F. B., & Cui, G. H. (2010). Correlation between loneliness and social relationship among empty nest elderly in Anhui rural area, China. Aging and Mental Health, 14(1), 108-112.	To study the possible associations between loneliness and social relationship (social support and family function) in Chinese empty nest elderly.	Quantitative descriptive	China. 1144 empty nest	Pearson’s correlation, and stepwise multivariable regression.	majority (80.94%) of empty nest elderly had moderate to high levels of loneliness, with a mean score of 42.84 and a standardized score of 53.55. The level of loneliness was significantly different in subjects’ age, marital status and income, but not in sex and education level. Social support and family function were significant negatively associated with loneliness. Multiple regression revealed t…	very good
Liu, L. J., & Guo, Q. (2007). Loneliness and health-related quality of life for the empty nest elderly in the rural area of a mountainous county in China. Quality of Life Research, 16(8), 1275-1280.	To estimate whether loneliness was associated with quality of life and examined the influence of socio- economic factors in the empty nest elderly	Quantitative descriptive	China. Multistage stratified random cluster sam.275 empty nest and 315 not empty nested.	T tests, Pearson's correlations and linear regression analysis	Empty nest group, in comparison with not empty nest group, had higher level of loneliness (95% confidence interval [CI] = -3.361 to -.335), lower physical (95% CI = .228 to 6.044) and mental (95% CI = .866 to 6.380) scores. Loneliness was negatively correlated with all the 36 Item Short-Form Health Survey scales in both groups. Social supports and income were negatively associated with loneliness…	Good
Saito, E., Sagawa, Y., & Kanagawa, K. (2005). Social support as a predictor of health status among older adults living alone in Japan. Nursing & Health Sciences, 7(1), 29-36.	To determine social support as a predictor of health status among older adults living alone, based on a 2-year longitudinal study in a rural area of Japan	Quantitative Descriptive	Japan. The self-reported questionnaires were distributed to 624 older adults living alone and were collected during home visits by welfare commissioners as baseline survey. After the follow-up survey of 493 respondents as the baseline survey, analyzed 340 persons who lived alone over the last 2 years.	Comparisons among continuous, ordered and categorical variables were made using the Student T -test, Mann–Whitney U -test and chi squared test. When the expectation value was less than five per cell, categorical variables were made using Fisher’s exact test. comparisons between the baseline survey and the follow-up survey were made by Wilcoxon signed-ranks tests and the Mann–Whitney U test.	Women had significantly higher emotional and instrumental support scores than men. Receiving positive support from the neighborhood had a significant effect on retaining activities of daily living for older women living alone. Receiving social support from the neighborhood brought an improvement in the health status of older adults, particularly women living alone.	Very good
Hinck, S. (2004). The lived experience of oldest-old rural adults. Qualitative health research, 14(6), 779-791.	To elicit the lived experience of 19 oldest-old adults (13 women, all White, mean age 90.7 years, range 85-98 years) who lived alone in the rural Midwest to describe their everyday activities, concerns and struggles, and adaptive strategies.	Qualitative	USA. 19.	Interpretive phenomenological themetic analysis.	All participants described strong reciprocal social support networks. During descriptions of a typical day, participants told of how they made and received phone calls and personal visits to watch out for the health and safety of themselves and others and to reduce loneliness. None of the participants viewed themselves as socially isolated despite, for some, a geographic distance of many miles fr…	Good
Van der Geest, S. (2004). “They don't come to listen”: The experience of loneliness among older people in Kwahu, Ghana. Journal of Cross-Cultural Gerontology, 19(2), 77-96.	To describe life conditions of elderly people in a rural community of Ghana.	Qualitative	Ghana. 35. Referral sampling	Not mentioned	Despite of the respect given to them, elderly people are denied what they regard as the most valuable proof of respect and companionship: listening to their wisdom and advice. Their loss of that ultimate respect constitutes an experience of loneliness.	poor
Cutrona, C. E., de la Mora, A., & Wallace, R. B. (1997). Loneliness and nursing home admission among rural older adults. Psychology and aging, 12(4), 574.	To explore the relation between loneliness and nursing home admission for an older rural population and to examine whether feelings of loneliness were related to nursing home admission over and above the influence of other risk factors.	Quantitative Descriptive	USA. 3763	Hierarchical logistic regression analysis	Higher levels of loneliness were found to increase the likelihood of nursing home admission. The influence of extremely high loneliness on nursing home admission remained statistically significant after controlling for other variables, such as age, education, income, mental status, physical health, morale, and social contact, that were also predictive of nursing home admission. Nursing home admis…	Very good
Cerhan, J. R., & Wallace, R. B. (1993). Predictors of decline in social relationships in the rural elderly. American Journal of Epidemiology, 137(8), 870-880.	To offer prospective evidence for predictors of decline in social relationships over a 3-year follow-up period in an elderly cohort are presented.	Quantitative Descriptive	USA. The cohort consisted of men (n = 903) and women (n = 1,673) over age 65 years in two rural Iowa counties who were interviewed in 1982 and again in 1985.	Those with higher social relationship levels at both interviews were compared with those who had higher levels at baseline but lower levels at follow-up (i.e., a decline in social relationship level) using logistic regression.	Important baseline predictors of decline in social relationship levels included greater age, lower educational level, lower memory test score, the presence of physical disabilities, and a higher level of depressive symptoms. Marital status and lower selfperceived health status were less consistent predictors, and having any living children, history of major illness, and continence status were gen…	Good
Wenger, G. C. (1984). Adapting to old age in rural Britain. The International Journal of Aging and Human Development, 19(4), 287-299.	To explore the ways in which the elderly in a remote rural area of Britain adapt to the problems of sparsity, lack of adequate public transportation, migration in and out of the region and the reality of increasing age.	Quantitative Descriptive	UK. 550	Not mentioned	the elderly are capable of adaptation and have a tolerance for isolation, and that changes in residence, household composition, and methods of access are made over time. Loneliness tends to increase with age and the widowed as a group are lonelier than others. However, although the very old tend to be lonelier, widows express less loneliness with the passage of time. Women appear more able to adj…	Poor
Kivett, V. R. (1979). Discriminators of loneliness among the rural elderly: Implications for intervention. The Gerontologist, 19(1), 108-115.	To determine from several physical and social variables the most important discriminators of loneliness among the rural elderly.	Quantitative Descriptive	USA. Random. 418.	Multiple step wise discriminate analysis	Older rural adults were classified as either high or low risks for loneliness according to a combination of physical and social losses that they had incurred. Frequent loneliness was associated with widowhood, poor vision and self-rated health, problems with transportation, frequent use of the telephone, low participation in organized social activities, and being female. Occasional loneliness was…	Poor
Arling, G. (1976). Resistance to isolation among elderly widows. The International Journal of Aging and Human Development, 7(1), 67-86.	To assess the social service needs of the aged, but the questionnaire also contained items pertaining to social involvement and daily activities.	Quantitative Descriptive	USA. 409	Pearson’s correlation.	respondents from rural areas have more frequent contact with their children than those from larger communities. Those who are financially secure and living in rural areas are most likely to see other relatives. Poverty either restricts mobility and allows for less contact, or may itself be a result of neglect on the part of family members who do not provide resources for the well-being of the res…	Poor
